# Supplementary figures and images for: Integrative Analysis Identifies Candidate Tumor Microenvironment and Intracellular Signaling Pathways that Define Tumor Heterogeneity in NF1
Source: MDPI journal article supplement (doi:10.3390/genes11020226), 2020-02-21

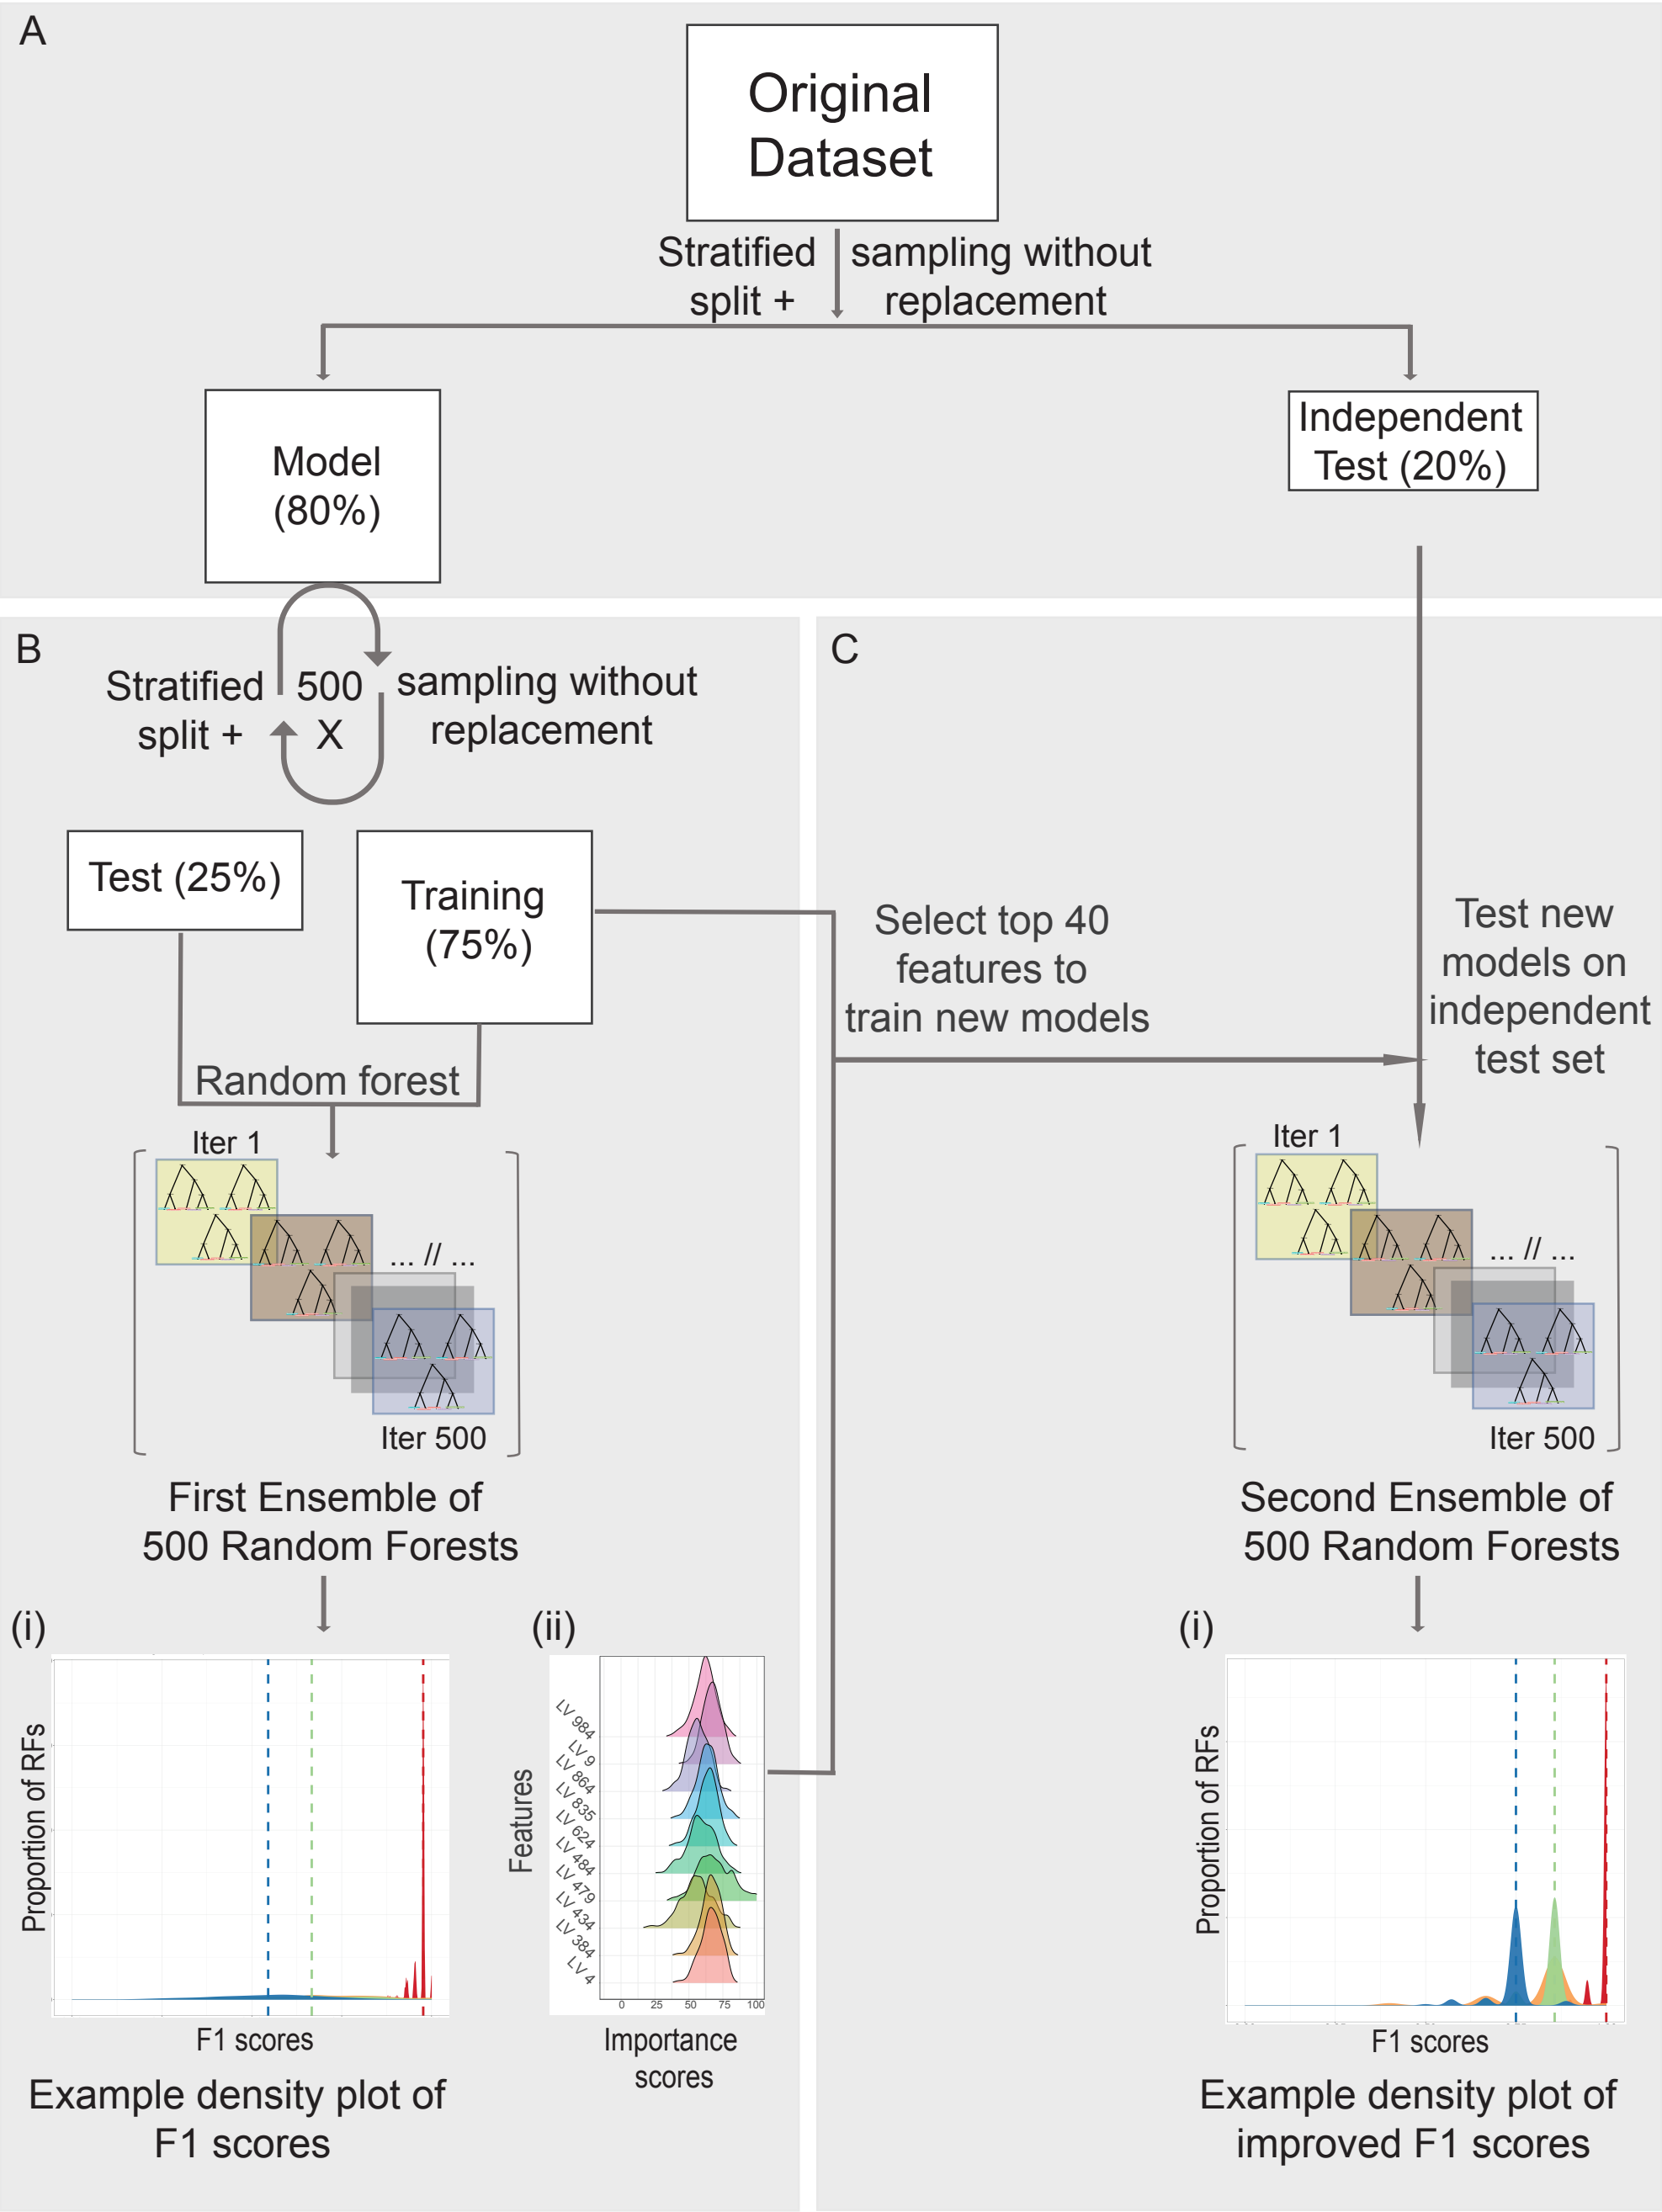

Supplement: s1 [file s1]
